# Supplementary material
Source: publisher figshare collection journal article supplement (https://geolsoc.figshare.com/ndownloader/files/30717135)
Supplement: Supplementary file 1 [file 30717135]

## Sheet: 2505 Ma
Vorochistoe Lake intrusion*
		С-2009-4	С-2001-6	С-2001-3	С-2006-2	С-2140-7
		gabbro-anorthosite	gabbro-anorthosite	gabbro-anorthosite	metaperidotite	metagabbro
	SiO2	52.52	51.38	47.08	37.6	50.53
	TiO2	0.62	0.82	1.22	1.24	1.13
	Al2O3	18.96	17.27	17.53	3.41	15.46
	Fe2O3T	7.932	10.222	12.408	30.204	10.643
	MnO	0.14	0.168	0.18	0.333	0.158
	MgO	5.14	6.5	7.36	22.02	6.83
	CaO	10.52	9.88	9.81	2.73	11.72
	Na2O	2.952	2.21	2.71	0.1	2.55
	K2O	0.63	0.48	0.73	0.05	0.57
	P2O5	0.12	0.17	0.14	0.12	0
	LOI	0.13	0.18	0.14	0.15	0.17
	Sum	99.664	99.28	99.308	97.957	99.761
	Li	7.042	3.611	9.639	0.749	7.086
	V	128.4	181.1	197.1	276.7	230.2
	Cr	179.4	200.3	221.9	2107	274.8
	Mn	796.1	1064	1209	2498	1071
	Co	21.78	28.56	44.6	154.2	35
	Ni	50.76	70	135.7	644.1	91.63
	Zn	53.76	74.55	89.44	187.2	71.78
	Ga	16.4	15.31	17.38	5.83	16.13
	Rb	11.8	12.12	8.322	0.584	7.001
	Sr	192.6	163.9	164.3	15.15	221.7
	Y	9.98	16.63	14.9	8.118	16.3
	Zr	16.21	33.61	25.45	12.08	9.239
	Nb	1.756	2.495	2.621	1.259	1.941
	Cs	0.267	0.267	0.007	0.035	0.092
	Ba	168.4	157	102.8	3.821	151
	La	5.259	7.618	6.704	3.102	7.158
	Ce	12.3	17.67	15.17	7.165	15.99
	Pr	1.469	2.274	2.027	1.008	2.256
	Nd	6.341	10.33	8.94	4.872	10.53
	Sm	1.943	2.739	2.6	1.627	3.483
	Eu	0.772	0.967	0.974	0.343	1.057
	Gd	2.015	3.218	2.825	1.411	3.265
	Tb	0.32	0.519	0.445	0.238	0.52
	Dy	1.971	3.152	2.724	1.473	3.094
	Ho	0.418	0.664	0.582	0.313	0.659
	Er	1.222	1.952	1.675	0.956	1.937
	Tm	0.178	0.285	0.243	0.143	0.27
	Yb	1.251	1.941	1.677	0.984	1.835
	Lu	0.236	0.287	0.249	0.149	0.267
	Hf	0.642	1.111	0.992	0.429	0.474
	Tl	0.058	0.072	0.057	0.009	0.051
	Pb	1.911	2.658	3.05	0.289	2.224
	Th	0.755	1.212	0.914	0.361	0.698
	U	0.169	0.258	0.212	0.086	0.137
	* - Stepanova et al. 2017

## Sheet: 2450 Ma
	Locality	Kiy Island intrusion			Udomnavolok intrusion
		relict layered series rocks			Gorbunov Island section
	Sample	Са-471-1	Са-471-2		C-215-18/2	C-215-18/3	C-215-18/4	C-215-18/5	C-215-18/6	C-215-18/8	C-215-18/9	C-215-18/10
		melano gabbronorite	leuco gabbronorite		gabbronorite near S contact	fine-grained gabbronorite	Qtz-bearing gabbronorite	Ol-free gabbronorite	gabbro-pegmatite	сumulative orthopyroxenite	leuco gabbronorite	gabbronorite near contact
	SiO2	52.15	49.66		56.89	53.22	53.61	50.35	52.87	49.61	53.68	54.82
	TiO2	0.28	0.23		0.38	0.41	0.42	0.29	1.62	0.33	0.73	0.43
	Al2O3	12.98	17.25		10.15	9.6	10.3	12.09	15.11	4.97	16.41	14.24
	Fe2O3T	7.74	7.22		9.8	11.18	10.46	9.6	6.77	10.39	8.97	7.7
	MnO	0.16	0.13		0.14	0.16	0.16	0.14	0.11	0.17	0.13	0.13
	MgO	13.33	11.27		11.7	15.96	15	16.19	7.99	23.5	7.04	9.28
	CaO	10.89	11.42		5.63	6.49	7.25	8.82	7.83	8.45	8.81	10.01
	Na2O	0.86	1.12		1.87	1.61	1.43	1.37	4.66	0.55	2.68	2.14
	K2O	0.27	0.29		1.64	0.84	0.87	0.39	0.81	0.34	1.12	0.61
	P2O5	0.02	0.02		0.05	0.04	0.03	0.02	0.23	0.03	0.09	0.03
	S	0.01	0.01		0.03	0.02	0.03	0.02	0.04	0.02	0.02	0.02
	LOI	0.64	0.76		1.26	bd	0.08	0.27	1.57	1.16	bd	0.15
	Sum	99.33	99.38		99.54	99.53	99.64	99.55	99.61	99.52	99.68	99.56
	Li	6.996	8.899		14.46	22.28	16.49	11.28	10.5	3.67	15.86	21.18
	Sc	26.95	18.12		30.15	25.9	26.78	24.12	26.98	30.09	26.44	29.98
	V	123.9	80.67		104.7	51.59	66.14	43.78	182.5	58.13	129.9	143.4
	Cr	1181	744.1		1071	1218	1138	1377	479.6	3007	380.4	577
	Co	39.57	42.34		49.65	62.34	54.14	54.11	25.4	70.35	32.63	36.83
	Ni	115.6	158.5		421	591	484.3	508.7	160.6	806.5	131.3	340.3
	Cu	23.43	29.13		27.3	19.33	29.21	16.73	264.5	32.66	69.27	184.8
	Zn	52.54	37.42		109.7	65.96	63.95	52.75	44.36	48.28	62.12	47.7
	Ga	7.656	10.26		10.34	9.738	9.518	7.485	17.97	4.838	15.77	11.86
	Rb	5.544	5.645		36.96	16.22	15.57	5.33	21.28	7.464	24.89	11.76
	Sr	183.5	259.6		191.3	181	185.6	205.7	278.2	72.28	310.8	239.4
	Y	5.034	3.876		9.878	9.973	9.895	4.696	23.26	5.852	14.06	8.781
	Zr	14.54	11.65		56.99	25.51	27.27	9.892	146.6	27.66	54.06	19.98
	Nb	0.524	0.628		2.601	1.87	1.709	0.54	8.722	1.304	1.801	0.836
	Cs	bd	bd		0.568	0.255	0.276	0.151	0.661	0.235	0.649	0.196
	Ba	80.9	100.6		331.2	239.5	230.8	95.48	488.5	90.69	316.6	150.8
	La	3.354	3.343		10.35	9.324	8.814	3.246	27.7	4.247	13.72	5.339
	Ce	6.6775	6.575		24.29	21.69	20.02	7.342	59.07	9.192	30.21	11.99
	Pr	0.959	0.965		3.081	2.746	2.48	0.953	7.018	1.239	3.68	1.547
	Nd	4.37775	4.0075		13.15	11.1033	10.4967	4.14133	28.2233	5.18967	14.7067	6.555
	Sm	1.06733	0.862		2.923	2.31367	2.269	0.971	5.59633	1.16733	3.02433	1.623
	Eu	0.34	0.3705		0.57	0.589	0.591	0.3645	1.3975	0.337	0.9785	0.65
	Gd	1.01767	0.900333		2.591	2.192	2.1605	0.996	5.118	1.266	3.011	1.6245
	Tb	0.154	0.136		0.403	0.366	0.358	0.175	0.842	0.199	0.489	0.286
	Dy	1.13567	0.878667		1.984	1.976	1.97133	0.982	4.59933	1.269	2.728	1.70733
	Ho	0.21	0.16		0.387	0.389	0.404	0.195	0.93	0.247	0.56	0.339
	Er	0.622667	0.486		1.06033	1.14267	1.163	0.563333	2.62067	0.753333	1.573	1.01033
	Tm	0.089	0.073		0.144	0.164	0.173	0.08	0.361	0.11	0.216	0.151
	Yb	0.625	0.460667		0.970667	1.05467	1.07267	0.558667	2.343	0.742	1.44067	0.943333
	Lu	0.091	0.065		0.145	0.168	0.156	0.078	0.336	0.106	0.217	0.134
	Hf	0.493	0.425		1.647	0.869	0.953	0.375	4.281	0.824	1.788	0.726
	Tl	bd	bd		0.2835	0.149	0.1335	0.0535	0.157	0.114	0.171	0.1105
	Pb	1.68333	2.48533		4.35267	3.26633	3.12067	1.41033	9.90167	1.62233	4.76367	3.186
	Th	0.553	0.57		1.016	1.094	1.168	0.476	4.392	0.739	2.257	0.823
	U	0.143	0.132		0.184	0.187	0.189	0.102	1.002	0.176	0.398	0.182

## Sheet: 2400 Ma
		Lake Kamennoe c. 2405 Ma intrusions									Ambarny c. 2411 Ma intrusion
	Sample	C-2000-18/1	C-2000-18/2	C-2000-18/3	C-2000-18/4	Ca-738-1*	Ca-738-2†	Ca-738-3	Ca-738-4		Са-451-1	Са-451-2	Са-453-1	Са-453-2	Са-454-1	Са-454-2	Са-460-1
		coarse-grained Ol gabbronorite	medium-grained Ol gabbronorite	taxitic gabbronorite	quenched rock	gabbronorite	quenched rock	Ol gabbronorite	quenched rock		metagabbronorite	Ol gabbronorite	Ol gabbronorite	Ol gabbronorite	Ol gabbronorite	Ol gabbronorite	Ol gabbronorite
	SiO2	49.52	49.41	49.88	50.18	51.14	49.58	49.67	50.39		48.88	49.81	48.97	50.13	50.11	51.08	49.82
	TiO2	1.45	1.31	1.39	1.18	1.73	1.22	1.65	1.16		0.46	0.44	0.51	0.65	0.42	0.53	0.42
	Al2O3	10.09	9.69	10.46	8.49	12.02	8.37	9.68	8.4		7.02	7.69	9.37	10.66	7.09	9.26	7.24
	Fe2O3T	13.82	13.35	12.86	12.86	12.38	13.14	13.9	13.01		12.72	12.62	12.78	12.41	12.6	12.16	12.91
	MnO	0.181	0.176	0.17	0.181	0.16	0.191	0.182	0.183		0.22	0.21	0.2	0.2	0.22	0.21	0.22
	MgO	12.08	13.33	12.3	14.27	9.69	14.51	12.24	14.05		20.17	19.83	18	15.48	20.52	16.88	19.97
	CaO	8.59	8.49	8.41	9.12	7.78	9.4	8.22	9.2		6.98	7.48	7.78	7.95	7.2	7.61	7.87
	Na2O	2.65	2.69	2.92	2.27	3.37	2.32	2.86	2.25		0.73	0.75	1.1	1.12	0.68	1.04	0.65
	K2O	0.8	0.67	0.75	0.57	1.07	0.59	0.9	0.57		0.26	0.33	0.44	0.6	0.31	0.41	0.29
	P2O5	0.13	0.12	0.13	0.1	0.18	0.1	0.16	0.1		0.04	0.04	0.05	0.06	0.03	0.05	0.03
	S										0.01	0.01	0.01	0.01	0.02	0.02	0.02
	LOI	0.37	0.37	0.42	0.34				0.32		1.73	0.01	0.01	0.01	0.01	0.01	0.01
	Sum	99.681	99.606	99.69	99.561	99.52	99.421	99.462	99.633		99.22	99.21	99.21	99.27	99.2	99.25	99.44
	Li	3.308	7.67	5.811	3.205	7.807		5.651	4.043		14.28	4.159	4.306	11.71	2.725	4.754	3.772
	Sc	27.91	25.97	24.89	27.87	23.63		26.59	26.09		22.9	31.87	27.28	27.3	27.88	27.74	28.47
	V	225.5	207.3	201	225.3	163.4		201.4	198.1		128.9	134	151.2	171.6	118.9	149.4	129.8
	Cr	1007	1132	979.9	1293	694		989.1	1153		2341	2342	2183	1785	2355	1843	2137
	Co	65.96	67.64	61.66	62.78	51.49		62.92	56.78		74.54	80.3	75.13	65.58	74.49	67.74	74.92
	Ni	384.6	441.9	383.7	435.5	279.7		372.3	378.6		547.2	566.6	638.4	514.8	538.7	448.9	517
	Cu	175.8	136.2	148.6	135.8	196.7		179.2	116.7		43.91	62.78	61.56	53.53	54.57	69.47	57.05
	Zn	103.4	92.06	89.71	87.2	101.8		102.8	77.75		73.79	69.77	66.59	73.63	60.39	67.48	60.1
	Ga	13.25	11.35	12.03	10.48	15.36		12.36	9.359		2.667	3.653	5.114	8.024	2.62	5.682	2.625
	Rb	26.7	21.28	23.32	17.97	36.63		30.6	16.5		4.882	10.05	12.7	17.35	8.152	10.55	6.941
	Sr	266.7	251.7	271.6	198.3	299.6		283	215.6		57.59	94.96	121.4	143.4	82.01	117.4	91.03
	Y	15.61	13.28	13.54	13.04	18.24		17.09	11.96		6.678	7.797	8.647	10.83	6.677	8.644	6.686
	Zr	84.09	73.57	83.41	79.8	116.2		113	73.34		25.13	30.11	38.19	36.99	27.12	25.81	23.87
	Nb	9.377	7.906	8.518	7.971	12.1		10.36	5.708		1.387	1.637	2.065	2.504	1.399	1.87	1.181
	Cs	0.637	0.509	0.562	0.448	0.884		0.756	0.422		0.571	1.33	0.27	0.325
	Ba	245.1	219.2	235.1	176.1	317		282	186.3		62.77	104.4	130.7	177.5	95.35	132.2	89.53
	La	16.32	14.23	14.75	11.73	22.37		20.42	11.61		4.62	4.916	5.921	7.619	4.311	5.884	3.88
	Ce	32.83	28.23	29.11	23.56	43.57		40.05	23.19		8.762	9.798	12.04	15.485	8.7435	11.5405	7.817
	Pr	4.667	4.003	4.162	3.42	6.137		5.711	3.363		1.209	1.344	1.756	2.253	1.231	1.737	1.19
	Nd	20.41	17.7733	18.2633	15.5	26.59		24.9567	15.3633		5.90525	6.3285	7.64275	9.7565	5.58875	7.3845	5.393
	Sm	4.53167	3.96633	4.04667	3.53567	5.533		5.521	3.608		1.38	1.47733	1.735	2.28133	1.25833	1.67033	1.26933
	Eu	1.323	1.1565	1.2255	1.035	1.5755		1.548	1.1035		0.421	0.4545	0.5395	0.7055	0.3975	0.5705	0.3935
	Gd	4.29867	3.72133	3.818	3.48033	5.159		5.15633	3.53067		1.52167	1.52267	1.71933	2.224	1.32567	1.741	1.267
	Tb	0.649	0.564	0.578	0.54	0.767		0.757	0.531		0.252	0.248	0.289	0.387	0.21	0.317	0.242
	Dy	3.336	2.945	2.952	2.86633	3.96333		4.018	2.89167		1.391	1.53467	1.79833	2.31867	1.38533	1.79067	1.38167
	Ho	0.63	0.55	0.571	0.538	0.753		0.769	0.544		0.276	0.287	0.337	0.452	0.268	0.355	0.27
	Er	1.712	1.509	1.53033	1.45433	1.96767		1.927	1.43533		0.833333	0.913	1.00367	1.296	0.819	1.04433	0.828667
	Tm	0.214	0.199	0.205	0.193	0.263		0.257	0.193		0.117	0.118	0.146	0.172	0.114	0.147	0.114
	Yb	1.37667	1.20933	1.23633	1.19233	1.58133		1.65633	1.22267		0.820333	0.883	0.969667	1.25033	0.793333	1.008	0.778667
	Lu	0.2	0.169	0.181	0.181	0.229		0.221	0.171		0.114	0.128	0.143	0.181	0.116	0.147	0.115
	Hf	2.305	2.032	2.272	2.333	3.109		3.193	2.22		0.815	0.855	1.132	1.095	0.83	0.843	0.773
	Tl	0.227	0.156	0.1625	0.123	0.219		0.6845	0.6735		0.0615			0.016
	Pb	3.98767	3.83133	4.067	3.00833	5.753		5.35467	3.073		0.916	1.58	2.051	2.63967	1.57033	2.15967	1.44
	Th	3.324	2.844	3.028	2.502	4.752		4.35	2.465		0.785	0.865	1.051	1.391	0.864	1.175	0.693
	U	0.81	0.719	0.806	0.593	1.138		1.062	0.625		0.246	0.196	0.262	0.309	0.18	0.251	0.157
	* - baddeleyite U-Pb age determined, Fig. 5c
	†- Fig. 5d

## Sheet: 2300 Ma
		Khitostrov metagabbro
	Sample	NK13-069	NK13-013	x-588	NK13-043	NK13-043-1	NK13-054-7
		metaferrogabbro	Grt amphibolite	melano amphibolite	melano amphibolite without garnet	migmatised melano amphibolite	lense of coarse-grained metagabbro
	SiO2	47.81	51.31	49.3223	52.6224	49.372	49.1723
	TiO2	2.28	2.16	2.03565	0.573272	0.76461	2.01273
	Al2O3	13.43	12.8	12.9487	11.2282	15.0737	12.2856
	Fe2O3T	19	17.67	16.2157	11.1887	13.9616	16.7594
	MnO	0.25	0.24	0.22839	0.158144	0.1986	0.219208
	MgO	5.43	5.09	5.17353	11.2974	7.75533	5.77912
	CaO	9.57	8.87	8.97672	9.96307	9.60231	9.26652
	Na2O	0.62	0.6	1.54908	1.11689	1.2909	0.727372
	K2O	0.67	0.72	1.12209	0.622692	0.72489	1.9928
	P2O5	0.21	0.19	0.16881	0.059304	0.08937	0.179352
	S	0.031	0.029	0.030783	0.029652	0.026811	0.0318848
	LOI	bd	bd	0.7	bd	bd	bd
	Sum	99.301	99.679	98.4718	100.02	99.5601	98.7864
	Li	5.812	6.194	29.32	9.837	6.916	19.29
	Sc	47.97	44.81	na	38.56	33.07	48.84
	V	430.5	400	393.6	203.1	256.8	399.5
	Cr	64.78	67.53	89.23	1121	58.04	88.6
	Co	49.5	43.59	49.73	56.01	57.9	50.67
	Ni	49.93	40.24	54.16	241.1	151.4	62.88
	Cu	115.8	58.68	118.7	60.78	69.27	243.3
	Zn	168	158.5	165	91.42	103.3	179
	Ga	18.79	17.63	21.21	10.97	15.39	19.17
	Rb	3.937	3.886	26.03	3.089	3.796	88.14
	Sr	66.23	41.07	166.5	57.85	90.15	56.88
	Y	44.47	39.39	43.03	10.22	14.41	37.71
	Zr	81.45	59.97	125.07	61.92	51.36	81.09
	Nb	11.5	10.44	11.1	1.989	2.675	9.743
	Cs	0.013	bd	0.778	0.007	0.031	1.715
	Ba	51.24	44.4	176.5	18.49	41.09	597.2
	La	15.09	9.614	9.132	4.303	5.725	15.24
	Ce	36.73	25.92	21.93	11.46	14.22	34.65
	Pr	4.972	3.865	3.823	1.39	1.69	4.684
	Nd	23.37	19.1	18.93	6.36	7.589	21.81
	Sm	6.541	5.655	6.056	1.69	2.034	6.003
	Eu	1.957	1.752	1.857	0.571	0.75	1.939
	Gd	7.777	7.012	7.543	1.967	2.571	7.238
	Tb	1.253	1.128	1.233	0.299	0.403	1.113
	Dy	7.865	7.073	8.02	1.871	2.632	6.778
	Ho	1.745	1.547	1.664	0.414	0.577	1.49
	Er	5.093	4.554	4.855	1.266	1.711	4.386
	Tm	0.71	0.646	0.686	0.175	0.234	0.61
	Yb	4.461	3.986	4.468	1.103	1.511	3.835
	Lu	0.681	0.634	0.606	0.173	0.225	0.587
	Hf	1.402	1.15	1.581	0.792	0.744	1.235
	Tl	0.046	0.053	1.969	0.043	0.048	0.592
	Pb	2.395	2.722	7.493	2.413	3.359	2.992
	Th	2.848	2.676	2.737	0.704	0.999	2.701
	U	0.606	0.564	0.534	0.141	0.281	0.636

## Sheet: 2230 Ma
		Pechnoy intrusion*
	Sample	Са-452-1	Са-452-2	Са-452-3	Са-459-1	Ca-497-2	Ca-497-3	Ca-497-4
	rock	medium-grained metagabbro	coarse-grained metagabbro	medium-grained metagabbro	metagabbro	fine-grained metagabbro	medium-grained metagabbro	medium-grained metagabbro
	SiO2	50.2	55.49	50.77	49.79	48.08	49.69	47.88
	TiO2	2.15	1.53	1.78	1.87	1.86	1.81	1.96
	Al2O3	11.84	16.03	10.99	9.92	9.33	9.76	10.18
	Fe2O3T	15.76	10.25	15.43	15.5	15.07	15.11	15.68
	MnO	0.2	0.13	0.2	0.2	0.165	0.18	0.164
	MgO	5.74	3.16	6.52	7.93	9	7.86	7.89
	CaO	7.92	5.25	8.47	9.56	10.85	9.5	9.41
	Na2O	4.09	5.93	3.59	3.2	3.68	4.01	4.07
	K2O	0.93	0.83	1.13	0.96	0.69	0.81	1.02
	P2O5	0.19	0.3	0.12	0.1	0.07	0.14	0.11
	S	0.01	0.01	0.01	0.01	bd	bd	bd
	LOI	0.37	0.51	0.36	0.34	<0.05	<0.05	<0.05
	Sum	99.4	99.42	99.37	99.38	99.4	99.4	99.4
	Li	10.57	17.7	21.11	14.11	12.67	10.16	12.09
	Sc	20.05	12.3	25.15	23.65	28.12	25.12	25.46
	V	234.6	139.4	285.2	241.6	298.7	241	290.8
	Cr	238.4	105.1	337.4	390.9	441.9	392.1	353.2
	Co	49.08	39.83	59.62	50.69	64.6	53.75	59.13
	Ni	88.89	68.48	127.6	139.2	207.2	139.4	155.2
	Cu	57.19	110.5	76.22	61.99	115.5	53	112.8
	Zn	106.3	80.36	116.3	97.26	91.1	97.52	100.7
	Ga	19.33	24.13	20.26	14.38	15.41	16.66	16.3
	Rb	26.37	22.03	39.96	30.35	13.09	25.43	37.59
	Sr	371.5	621.7	348.8	264	316.9	293.3	326.1
	Y	19.1	17.24	21.28	15.36	15.18	19.65	15.54
	Zr	145.1	228	178.1	118.1	84.59	136.2	85.25
	Nb	12.86	13.87	14.54	8.218	6.749	11.67	8.383
	Cs	1.168	1.107	0.876	0.376	0.28	0.486	1.09
	Ba	225.5	322.3	240	161.5	126.4	176.3	204.9
	La	16.61	23.49	19.48	11.61	9.913	15.85	12.75
	Ce	36.35	43.92	41.975	25.91	25.09	37.36	29.57
	Pr	5.801	6.256	6.257	3.778	3.53	5.079	3.945
	Nd	25.42	26.7575	27.855	18.18	16.4733	23.0533	18.08
	Sm	5.733	5.40933	6.47967	4.45867	4.00033	5.261	4.05067
	Eu	1.7335	1.821	1.7675	1.357	1.363	1.569	1.3415
	Gd	5.35067	4.882	5.703	4.345	4.24767	5.348	4.34033
	Tb	0.863	0.738	0.866	0.659	0.612	0.803	0.652
	Dy	4.582	3.85667	4.91933	3.751	3.388	4.384	3.571
	Ho	0.772	0.663	0.849	0.663	0.637	0.789	0.618
	Er	2.09333	1.81767	2.27433	1.80367	1.71467	2.232	1.758
	Tm	0.278	0.234	0.283	0.224	0.223	0.273	0.235
	Yb	1.77833	1.57767	2.00267	1.50533	1.48133	1.90467	1.453
	Lu	0.256	0.223	0.272	0.207	0.188	0.261	0.171
	Hf	3.837	5.248	4.448	3.273	2.286	3.404	2.25
	Pb	2.53567	3.614	3.35133	3.417	4.13233	2.889	4.98433
	Th	3.585	5.145	3.921	2.892	1.89	3.387	2.23
	U	0.693	1.26	1.534	0.718	0.412	0.802	0.552
	* - Stepanova et al. 2021

## Sheet: 2120 Ma
Garnet-rich metagabbro dykes
		Fe-Ti enriched geochemical type									MORB-type
	Locality	Kulezhma	Kulezhma	Kulezhma	Kulezhma	Boyarsky area	Boyarsky area	Boyarskiy area	Boyarskiy area		Cape Gridin	Vorotnaya Luda
	Sample	Са-581-1	Са-581-2	Са-581-6*	NK17-011	Са-449-1	Са-449-2	С-2717-15/2†	С-2717-15/3		Ca-154-8	C-2407-64‡
	rock	coarse-grained metagabbro	quenched fine-grained metagabbro	coarse-grained metagabbro	metagabbro	fine-grained metagabbro	medium-grained metagabbro	medium-grained metagabbro	medium-grained metagabbro		metagabbro	metagabbro
	SiO2	46.1	47.14	48.56	49.88	50.1	50.4	49.27	49.15		49.36	48.83
	TiO2	2.28	1.93	1.82	1.79	1.61	1.43	1.56	1.5		0.96	0.99
	Al2O3	10.63	12.71	12.81	13.9	12.72	13.18	16.03	14.06		11.7	14.66
	Fe2O3T	20.42	18.44	16.86	14.56	17.05	16.13	14.9	15.99		13.41	14.136
	MnO	0.269	0.26	0.239	0.208	0.27	0.27	0.24	0.26		0.202	0.22
	MgO	7.43	6.26	6.19	5.75	5.62	5.86	4.51	6		9.31	7.32
	CaO	10.06	10.49	9.84	10.09	9.78	9.93	9.95	10.02		11.96	11.02
	Na2O	1.72	2.08	2.14	2.56	1.62	1.63	2.41	1.93		1.97	1.96
	K2O	0.31	0.21	0.38	0.65	0.48	0.45	0.39	0.34		0.08	0.03
	P2O5	0.13	0.14	0.17	0.25	0.14	0.12	0.12	0.12		0.11	0.09
	LOI			0.3		0.6	0.47	0.19	0.39		1.4	1.14
	Sum	99.349	99.66	99.309	99.638	99.99	99.87	99.57	99.76		100.462	100.396
	Li	8.811	6.985	7.116	29.82	18.12	21.52	13.57	15.63		15.93	8.78522
	Sc	48.01	47.8	38.83	39.04	49.4	49.72	31.17	42.29		43.41	38.7892
	V	558.8	435.2	273.6	313.3	358.4	347.7	274.9	369.2		309.23	261.362
	Cr	147.1	130.3	142.6	135.7	107.8	94.5	76.81	145		198.22	276.624
	Co	53.6	42.98	45.58	47.15	55.3	54.33	41.6	49.51		54.52	58.6108
	Ni	84.62	54.21	77.59	75.49	79.99	78.34	55.83	75.86		108.44	164.236
	Cu	129.4	57.26	121.7	138.8	277.5	225.7	132.4	120.7		175.26	150.429
	Zn	152.2	123.7	133.3	121	148.2	140.1	112.2	130		79.8	74.4269
	Ga	16.04	16.96	15.83	18.77	17.87	17.85	18.74	18.71		15.38	17.8389
	Rb	7.399	2.536	8.512	24.82	15.25	13.13	7.759	7.055		bd	0.287322
	Sr	96.59	111	110.4	190.1	109	110.7	121.1	115.7		59.64	52.6892
	Y	35	36	40	41	33.57	29.72	24.5	27.57		17.96	21.3959
	Zr	112	81	147	202	106.1	68.27	42.99	65.7		33.57	70.2395
	Nb	8.879	7.775	10.44	13.06	6.841	5.589	6.29	7.643		1.68	4.68414
	Cs	0.089	0.075	0.134	0.392	0.307	0.26	0.157	0.102		bd	0.0113849
	Ba	77.97	52.68	95.33	206.9	140.7	126.3	88	80.19		17.99	7.40172
	La	6.989	3.953	9.618	16.29	11.09	9.526	7.452	7.064		2.5	3.71071
	Ce	18.85	11.39	24.37	37.32	23.13	20.315	17.99	17.665		6.39	9.48975
	Pr	2.574	1.773	3.28	5.048	3.321	3.041	2.762	2.684		0.97	1.40896
	Nd	13.2267	9.81367	16.71	22.36	17.2925	15.5875	14.5475	14.6775		5.25	6.61599
	Sm	3.508	3.004	4.235	5.975	4.61833	4.15933	3.92033	4.18		1.67	2.07029
	Eu	1.2435	1.2775	1.3925	1.647	1.35	1.23	1.2915	1.337		0.75	0.62357
	Gd	4.907	4.396	5.348	6.313	6.065	5.48367	4.91633	5.428		2.7	2.42811
	Tb	0.818	0.797	0.934	1.017	1.008	0.893	0.789	0.852		0.46	0.442021
	Dy	5.03	5.0205	5.673	6.14067	6.59467	5.80367	4.97433	5.50767		3.37	3.26557
	Ho	0.955	1.011	1.18	1.271	1.295	1.134	0.948	1.048		0.72	0.77729
	Er	3.04867	3.08767	3.42767	3.73467	4.03567	3.53467	2.882	3.22333		2.15	2.47853
	Tm	0.448	0.483	0.5	0.544	0.558	0.497	0.398	0.454		0.3	0.389424
	Yb	2.824	2.93133	3.18433	3.53233	3.95967	3.52433	2.78667	3.16167		2.17	2.50941
	Lu	0.388	0.443	0.508	0.563	0.574	0.511	0.402	0.449		0.3	0.385179
	Hf	2.263	1.07	2.88	1.563	3.041	1.998	1.238	1.848		0.45	0.707056
	Tl	0.034	bd	0.038	0.066	0.0525	0.038	0.029	0.0365		bd	0.0222764
	Pb	1.892	1.112	2.01367	3.16233	2.873	2.26567	1.74433	1.89333		bd	0.907888
	Th	1.239	0.558	1.711	2.187	1.699	1.447	1.223	1.237		0.548	0.503741
	U	0.322	0.124	0.415	0.542	0.435	0.354	0.355	0.371		bd	bd
	* - zircon dated at 2124 Ma (Table 1, Fig. 8)
	† - Boyarskoe Lake area dyke, 2115 Ma (Stepanova, Stepanov, 2010)
	‡ - data from Stepanova, Stepanov (2010), the same dyke as studied by Berezin et al. (2012)
